# Supplementary figures and images for: The important role of glycerophospholipid metabolism in the protective effects of polyphenol-enriched Tartary buckwheat extract against alcoholic liver disease
Source: Royal Society of Chemistry journal article supplement (doi:10.1039/d2fo01518h), 2022-01-01

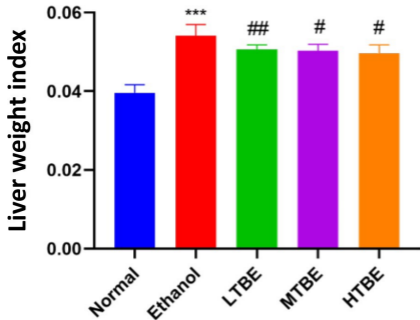

Supplement: d2fo01518h3.pdf [file d2fo01518h3.pdf]

HeatmapTree

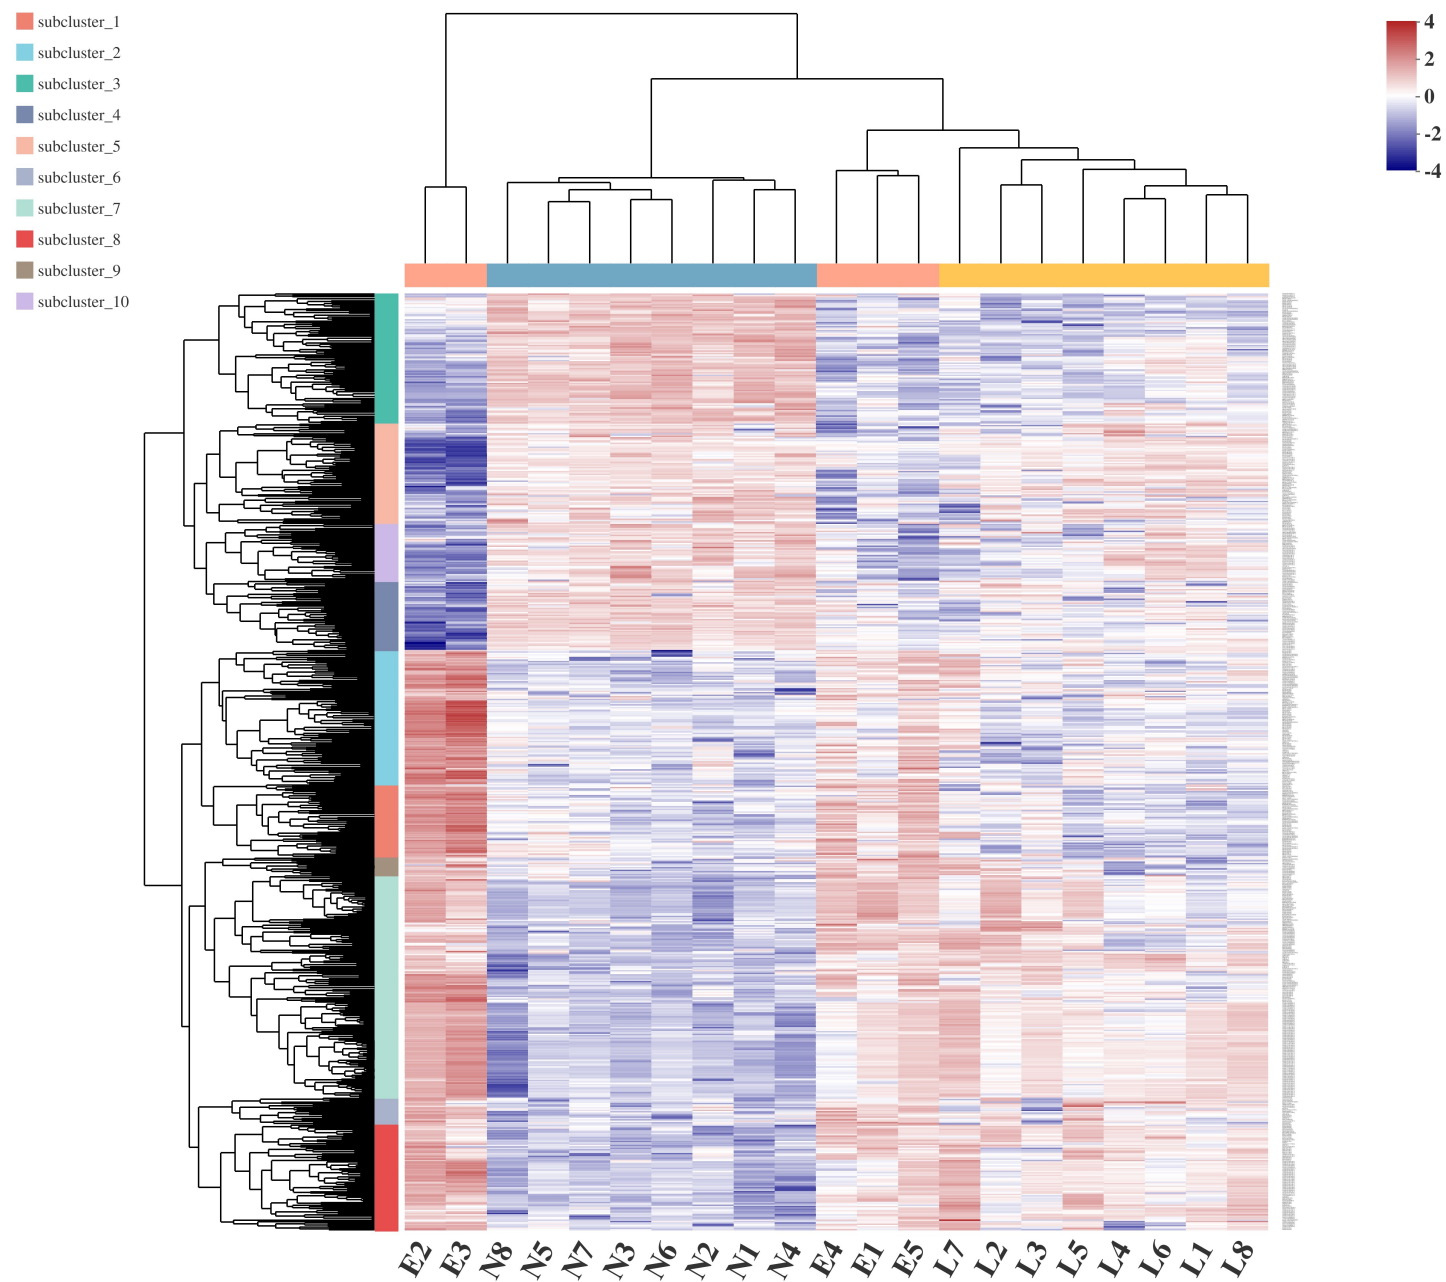

Supplement: d2fo01518h4.pdf [file d2fo01518h4.pdf]

HeatmapTree

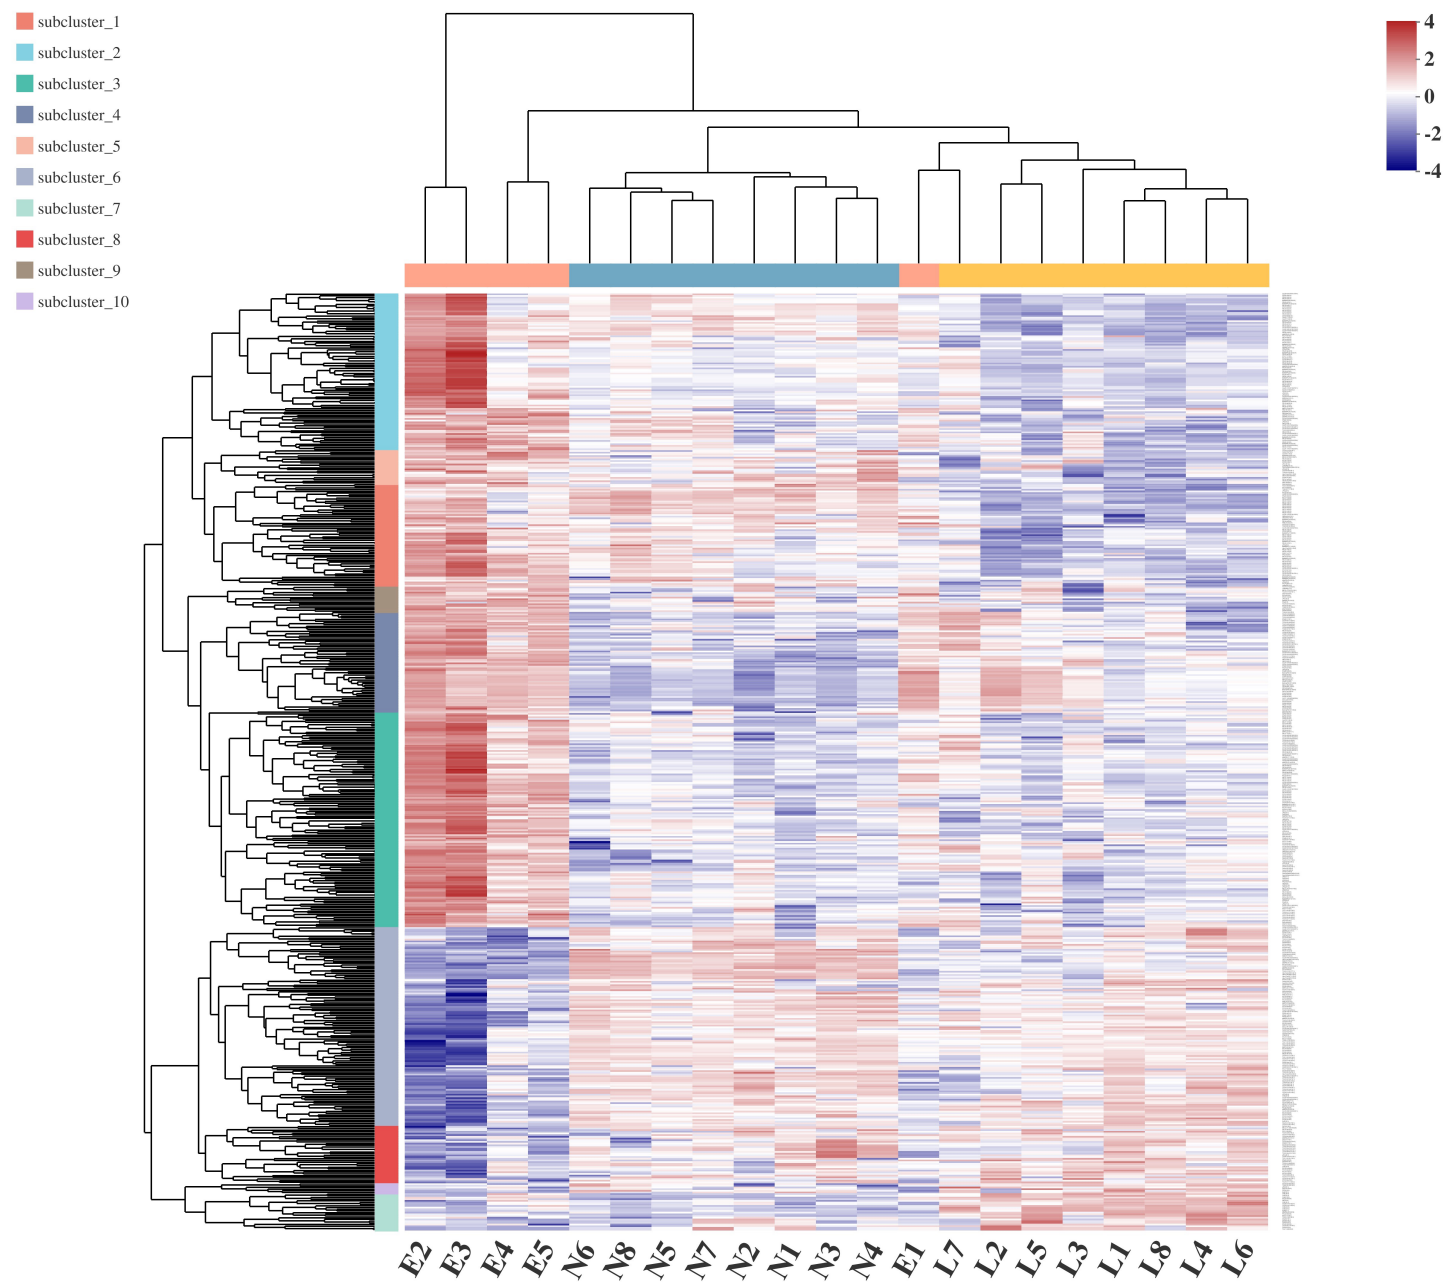

Supplement: d2fo01518h5.pdf [file d2fo01518h5.pdf]

HeatmapTree

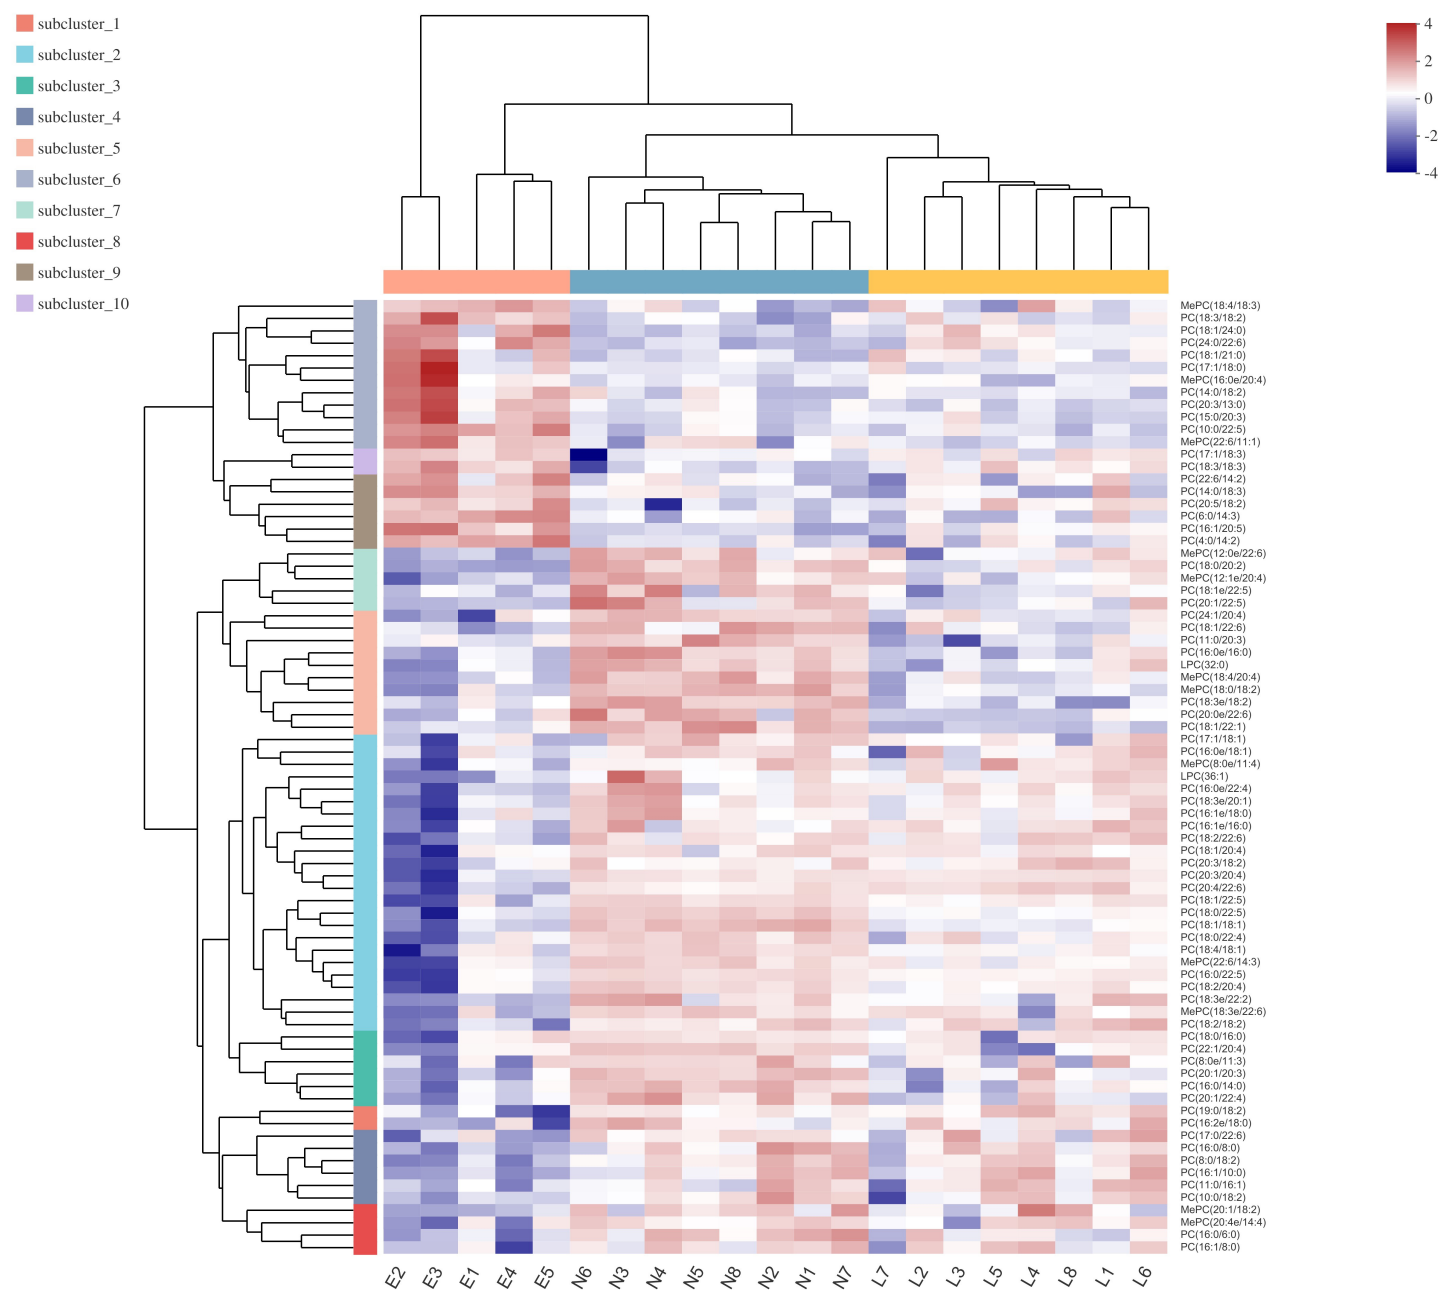

Supplement: d2fo01518h6.pdf [file d2fo01518h6.pdf]
